# Supplementary material for: Interpreting the functional role of a novel interaction motif in prokaryotic sodium channels
Source: PubMed Central journal article supplement — J Gen Physiol. 2017 Jun 5;149(6):613–22. doi: 10.1085/jgp.201611740 (PMC5460950; doi:10.1085/jgp.201611740), 2017-06-05
Supplement: JGP_201611740_sm.pdf [file JGP_201611740_sm.pdf]

## SUPPLEMENTAL MATERIAL

Sula and Wallace, <https://doi.org/10.1085/jgp.201611740>

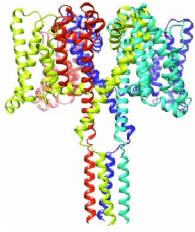

Video 1. **Morphing between NavMs (open pore, activated VS structure; PDB ID 5HVX; Sula et al., 2017) and CavAb (closed pore, preactivated VS structure; PDB ID 5KLB; Tang et al., 2016) structures.** Each of the monomers in the tetramer is depicted in a different color. This animation clearly shows the role of the IM in gating-related conformational changes. The morph trajectories and video were created using Chimera (Pettersen et al., 2004).

## REFERENCES

- Pettersen, E.F., T.D. Goddard, C.C. Huang, G.S. Couch, D.M. Greenblatt, E.C. Meng, and T.E. Ferrin. 2004. UCSF Chimera—a visualization system for exploratory research and analysis. *J. Comput. Chem.* 25:1605–1612. <http://dx.doi.org/10.1002/jcc.20084>
- Sula, A., J. Booker, L. Ng, C.E. Naylor, P.G. DeCaen, and B.A. Wallace. 2017. The complete structure of an activated open sodium channel. *Nat. Commun.* 8:14205. <http://dx.doi.org/10.1038/ncomms14205>
- Tang, L., T.M. Gamal El-Din, T.M. Swanson, D.C. Pryde, T. Scheuer, N. Zheng, and W.A. Catterall. 2016. Structural basis for inhibition of a voltage-gated Ca<sup>2+</sup> channel by Ca<sup>2+</sup> antagonist drugs. *Nature.* 537:117–121. <http://dx.doi.org/10.1038/nature19102>
